# Supplementary material for: Exploring the selectivity of PI3Kα and mTOR inhibitors by 3D-QSAR, molecular dynamics simulations and MM/GBSA binding free energy decomposition
Source: Royal Society of Chemistry journal article supplement (doi:10.1039/c3md00157a), 2013-01-01
Supplement: c3md00157a.pdf [file c3md00157a.pdf]

a

3QAQ: 0001 SEESQAFQRLTALIGYDVTDVSNVHDELEFTRFGLVTPRMAEIVASRTP-----  
 PI3K $\alpha$ : 0107 NREEKILNREIIGFALGMPVCFEFDMLKLPVQDFRENILLNVCKEADLRRLNSPHS

3QAQ: 0051 -KLYAMHEWWTSKP--LPEYLWKKIANNCIFIVLHRSTTS-----QTIKVSPTDT  
 PI3K $\alpha$ : 0162 RAMYVYPENVESSEELPKHIYNKLDKQQLVVIWVIVSPNNDKQKYTLKINHDCV

3QAQ: 0098 FGATILQS-----FDVLRVCGRDEYLVGETPIKNFQ  
 PI3K $\alpha$ : 0217 EEQVIAEAIRKKTRSMLLSSEQLKLCVLEYQGKYILKVGCCDEYFLEKYPLISQYK

3QAQ: 0129 WVRHCLKNSEEIHVVIDT-----EP-----D-PALDEVKRET--VS  
 PI3K $\alpha$ : 0272 YIRSCIMLGRMPNLMIMAKESLYSQLEMDCFMPSYSRRISTATPYMNGETSTKS

3QAQ: 0162 LWDCDRKFRVKIRG---IDIPVLDIT-VFVEANIQHCQVLCQRRTPKPFTEEV  
 PI3K $\alpha$ : 0327 LWVINSALRIKILCATYVNVNTRIDKIYVIRGTYHCGEPVLCNDVNTQVRVPCSNP

3QAQ: 0213 LWNVWLEFSIKIKDLPKGALENNQTY--CGKVQL--LY----YVNIILLIDHRFLI  
 PI3K $\alpha$ : 0382 RFNENLNYDIYTPDLPRARRCSLCSVKGRKGAKEEHCPVWGNINLEFDYDITL

3QAQ: 0260 RRGEYVILHMWQISSFNALKIT----SATNPKEN-SMSTSLLDNHPVIALPKHQV  
 PI3K $\alpha$ : 0437 VSGKMAINLWPVPHGLELLNPIGVTIGSNENKHTPCLELEFDWFSVVKFVDMSTV

3QAQ: 0310 RAEMP-----NQLR---R-QIEAIIATDPIINPLIAE  
 PI3K $\alpha$ : 0492 IEEHANWSVSREAGFSYSHAGLSNRLARDNELFENDNEQLKATSTRDPISEIEEQ

3QAQ: 0337 DKELLWHFRYESLKHFKAYPKLFSVVKWQQQEIIVAKTYQLLARREVWQOSALDVG  
 PI3K $\alpha$ : 0547 EKDFLWSHRHVCVTIPEIILPKLILSVKWNSTRDEVAQMYCLVK-----IWPPIKPE

3QAQ: 0392 LTMQLLDCNFSLENVRAIAVQKLES-LEDVDLHYLLQLVQAVKFPVHSAIAR  
 PI3K $\alpha$ : 0597 QAMELLDCNYPVPMVRFVAVRCLEKYLTDDKLSQYLIQLVQVLYKYQLLNLLVVR

3QAQ: 0446 FLLKRGLRNKRIGHFLFWFLRSEIAQSRHYQREAVILEAVLFGCCTAMLDFTQ  
 PI3K $\alpha$ : 0652 FLLKKALTNQRIGHFFFWHLKSEMHN-KTVSQRGLLLESYCRACQMYKTI-LNR

3QAQ: 0501 QVQVIEMQKVTILDIKSLSAIVSSQVISQLKQKLENLQNS---QLPESRVEFYDF  
 PI3K $\alpha$ : 0705 QVEAMEKTIINLTDILKQEKKEETQKV--QMKFLVEQMRPDMFALQGLSILNR

3QAQ: 0553 GLKAGALAEIKCKVMASKKPKLWLEFKCAEPT-AISNETIGIIFKHGDDLQDML  
 PI3K $\alpha$ : 0758 AHQLGNLRLEECRIMSSAKRPLWLNWENPIMSEILFQNETIIFKNGDDLQDML

3QAQ: 0607 ILQILRIMESIWEETESLDICLLPYGCIETGDKIGMIEIVKDATPIAKIQQS---T  
 PI3K $\alpha$ : 0813 TLQIIRIMENIWQNQGLDRLMLPYGCLSIGDCVGLIEVVRNSHTIMQIQCKGGLK

3QAQ: 0659 VGGAFKDEVLNHWLKEKSPTEKFKQAAVEREVYSCAGYCVATFVLGIGDRHNDNI  
 PI3K $\alpha$ : 0868 GALQENSHTLHQWLKDKN-KGHIYDAAIDLSTRSCAGYCVATFILGIGDRHNSNI

3QAQ: 0714 MITETGNLFHIDFG----H-----KERVPPVLTIPDFLIVMGTSGKK--TS  
 PI3K $\alpha$ : 0922 MVKDDGQLFHIDFGHFLDHEKKKKFGYKRERVPPVLTIPDFLIVISKGAQECTKIRE

3QAQ: 0755 FQKFQDICVKAYLALRHHTNLLIILFSMMLMTGMPQITSKEDIYIRDALTVGKN  
 PI3K $\alpha$ : 0977 FERFQEMCYKAYLAIROHANLEINLFSMMLGSGMPELQSFDDIAYIRKTLALDKT

3QAQ: 0810 EEDAKKYFLDQIEVCRDKGWTIVQFNWFL-----  
 PI3K $\alpha$ : 1032 EQEALEYFMKOMNDAHGGWTITKMDWIEHTIKQHALN

b

3QAQ: 0001 SEESQAFQRLTALIGYDVTDVSNVHDELEFTRFGLVTPRMAEIVASRTP-----  
 mTOR: 1577 AMAGESYSRAYGAMVSCMMLSELEEVIQYKLVPERREIIRQIWWVRLQGCQRIVE

3QAQ: 0048 RDPKLIYAMHPWTSKPLPEYLNKRIANN--IF-IVIHRSITSQTIKVSFDDTPG  
 mTOR: 1632 DWQKILMVRSLVVSYPHEDMRTNLYASLGGKSGRLALAHKILVLLLGIDFSRQLD

3QAQ: 0100 AILQSDFVLRVCGRDEYLVGETPKNFWVRCLKNGEHIHVLDTPPP-ALD  
 mTOR: 1687 HPLPTVHPQVTYAYMKNMWKSARKIDAFQHMQHFVQTMQQQAHAIAATEQQHKQ

3QAQ: 0154 EVRKETVSLWDCDRKFRVKIRGIDIPVLDLTVFVEANTIQHGQQVLCQRRTSPKPF  
 mTOR: 1742 ELHKLMARCEFLKLGEWQLNLOGIN-----ESTIPKVLQYYSAAATEHDRSWYKAW

3QAQ: 0209 TEEVLWVWLEFSIKIKDLPKGALLNLQIYCKVQLLYYVNLLLIDHRFLLRRGE  
 mTOR: 1791 HAWAVMFEAVLHYKHQHQARDEKKLRHASSANITNATTAATTAATATTTASTE

3QAQ: 0264 YVLHMWQISSFNADKLTSATNPDKENSMSISILLDNHIALPKHVRRAEMP-NQL  
 mTOR: 1846 GSNSESEAESTENSPTSPPLQKKVTEDDLKTLMLYTVFAVQGFERSISLSRGNL

3QAQ: 0318 RKQLEAIIATDPLNPLTAEDKELLWHFRYESLK-HPKAYFKLFSVVKWGOQETVA  
 mTOR: 1901 QDTRVLTTLWFQYGHWPDVNEAVEGVKAIQIDTWLQVLPOLARIDTPRPVLR

3QAQ: 0372 KTYQLIARREVVDQSALDVGELTMQLLDCNFSDEVRAIAVQKLESLE----D-DD  
 mTOR: 1956 LIHQLLTIDIGRYHPQALIYPLTVASKSTTTARHAAANKILKNMCEHSNTLVQAM

3QAQ: 0422 VLHYLLQLVQAVKFPYPYHDSALARFLKRLRNKRIGHFLWFVRSEREAQS----  
 mTOR: 2011 MVSEELIRVAAILWHEMWHEGLEEASRLYFGERNVKGMFEVLEPHAMMERGPQTL

3QAQ: 0473 -R-HYQCRFAVILEAYLRGGTANLH-DFTQQVVIEMLQKVTLDKSLSDADVSS  
 mTOR: 2066 KETSFNQAYGRDMEAQEWARKYKSGNVKDLTCAWDLYYHWFRRISKQLPQLTS

3QAQ: 0525 QVTSQIKQKIENLQNSQLPESFRVPYDPLKAGALAIKCKVMASKKKLWLEFK  
 mTOR: 2121 LELQYVSPKILMCRDLELAVPGTYDPNQPIIRIQSIAPSLQVITSKQRERKTLM

3QAQ: 0580 CADPTALSNETIGIIFKPHGDDLRLQMLILQILRIMESIWETE-S---LDICLLPF  
 mTOR: 2176 GSN-----GHEFVFLKKGHEDLRLQERVMQLEGLVNTLLANDPTSLRKNLSIQRY

3QAQ: 0631 GCI STGDKIGMIEIVKDATIIAKIQOST-----VGGAF-----  
 mTOR: 2226 AVIPLSTNSGLIGWPHCDILHALIRDYREKKKILLNIEHRIMLRMAPDYDHLTL

3QAQ: 0664 KD--EVLNHWLK-----EKSPTEKKEQAAVERFVYSCAGYCVATFVLG  
 mTOR: 2281 MOKVEVFEHAVNNTAGDDLAKLLWLKSPSSVWFDRRTNYTRLLVMSVGYILG

3QAQ: 0705 IGDRLNDNIMIT-ETGNLFHIDFGHKERVPFV---L---TDFLFWVGTSGKKT  
 mTOR: 2336 LGDRHPSNMLDRLSGKILHIDFGDCFVAMTREKPEKIFRTRLLNAMEVT

3QAQ: 0753 PHFQKFQDIQVKAYLALRHHTNLLIILFSMMLMTGMP--QLTSKEDI EYIRDALT  
 mTOR: 2391 GLDGNRYRITGHTVMEVLEKESVMAVLEAFVYDPLLNWRIMDTNTKGNKSRTR

3QAQ: 0806 VGKNEEDAKKYFLDQIEVCRDKGWTVQFNWFL-----  
 mTOR: 2446 TDSYSAGQSVEILLGVELGEPAAHKKTGTTVPESIHSFIGDGLVKPEALNKKAIQ

Figure S1. Multi-sequence alignment of PI3Ka, mTOR and the template PI3K $\gamma$  (a: PI3Ka and PI3K $\gamma$ ; b: mTOR and PI3K $\gamma$ ).

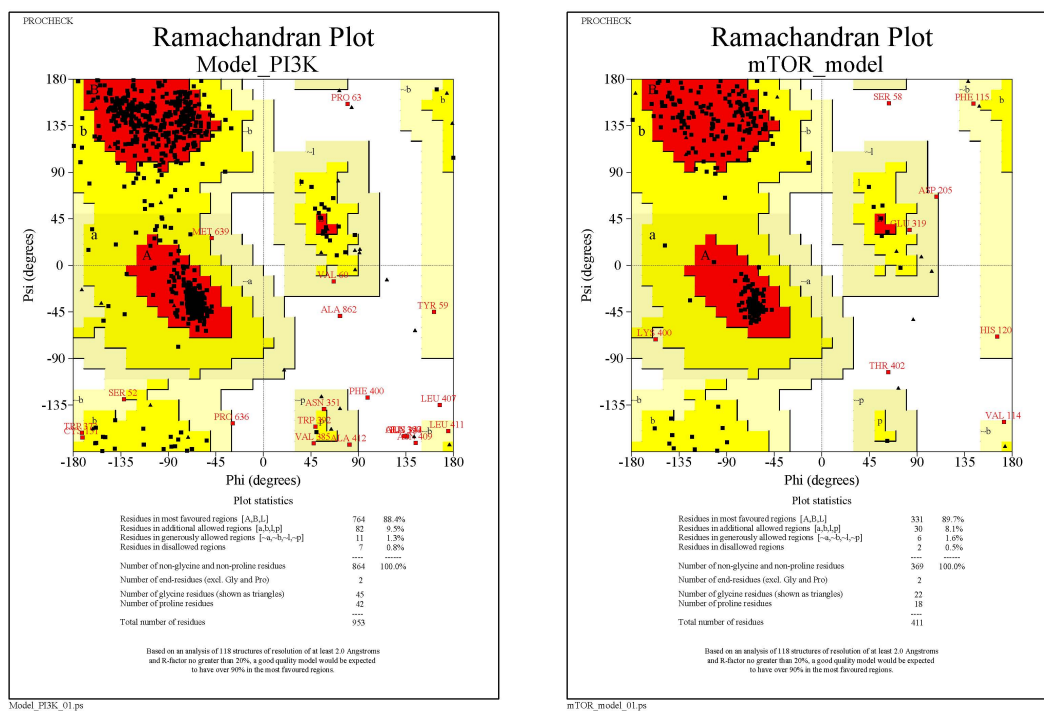

Figure S2. Ramachandran plot of homology models by PROCHECK

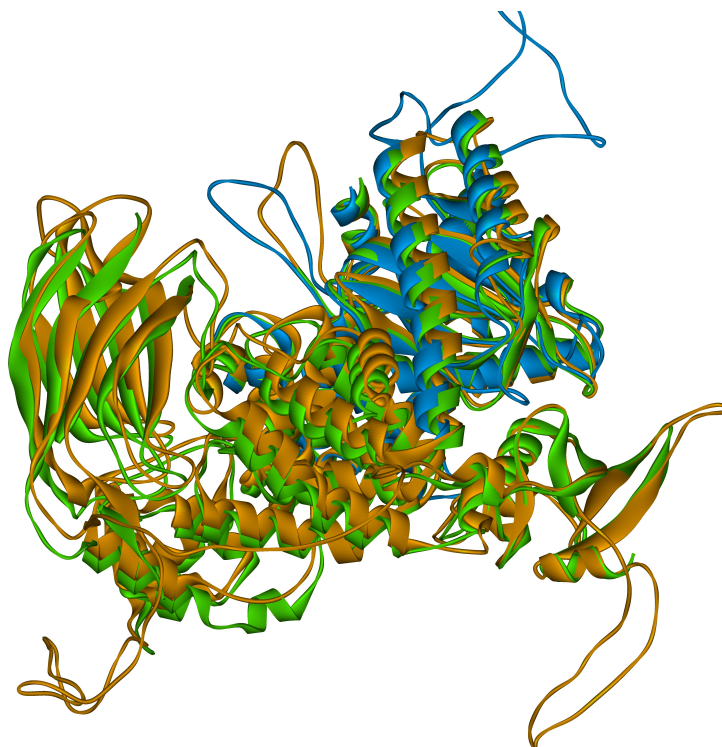

**Figure S3.** Superimposition of homology models and the template (green: PI3K $\gamma$ ; yellow: PI3K $\alpha$ ; blue: mTOR).

**Table S1.** Binding free energy contribution of the key binding-site residues calculated from the binding energy decomposition (kcal/mol).

Compound **25** with mTOR

| Residue | $\Delta E_{\text{vdw}}$ | $\Delta E_{\text{ele}}$ | $\Delta G_{\text{GB}}$ | $\Delta G_{\text{SA}}$ | $\Delta G_{\text{bind}}$ |
|---------|-------------------------|-------------------------|------------------------|------------------------|--------------------------|
| L2185   | -0.871                  | -0.106                  | 0.051                  | -0.14                  | -1.066                   |
| K2187   | -0.217                  | 2.451                   | -2.215                 | -0.093                 | -0.074                   |
| D2195   | -0.098                  | -1.932                  | 0.281                  | -0.018                 | -1.767                   |
| Y2225   | -1.151                  | -0.649                  | -0.33                  | -0.29                  | -2.42                    |
| I2237   | -0.87                   | 0.049                   | -0.114                 | -0.187                 | -1.122                   |
| W2239   | -6.34                   | -0.262                  | -0.282                 | -0.595                 | -7.479                   |
| V2240   | -1.494                  | -4.4                    | 0.808                  | -0.256                 | -5.342                   |
| P2241   | -0.761                  | -1.154                  | 0.531                  | -0.106                 | -1.49                    |
| C2243   | -1.883                  | -2.362                  | -0.018                 | -0.264                 | -4.527                   |
| M2345   | -1.493                  | 0.056                   | -0.062                 | -0.172                 | -1.671                   |
| I2356   | -2.927                  | -0.707                  | -0.113                 | -0.309                 | -4.056                   |
| D2357   | -1.226                  | -0.934                  | -0.89                  | -0.215                 | -3.265                   |

Compound **65** with mTOR

| Residue | $\Delta E_{\text{vdw}}$ | $\Delta E_{\text{ele}}$ | $\Delta G_{\text{GB}}$ | $\Delta G_{\text{SA}}$ | $\Delta G_{\text{bind}}$ |
|---------|-------------------------|-------------------------|------------------------|------------------------|--------------------------|
| Q2161   | -0.149                  | -0.253                  | 0.262                  | -0.006                 | -0.146                   |
| I2163   | -0.014                  | 0.047                   | -0.05                  | 0                      | -0.017                   |
| T2164   | -0.004                  | -0.05                   | 0.05                   | 0                      | -0.004                   |
| K2187   | -0.926                  | 3.075                   | -2.051                 | -0.259                 | -0.161                   |
| E2190   | -0.091                  | 1.673                   | -1.588                 | -0.002                 | -0.008                   |
| D2195   | -0.367                  | 0.112                   | -0.614                 | -0.16                  | -1.029                   |
| Y2225   | -1.769                  | -1.041                  | 0.634                  | -0.345                 | -2.521                   |
| V2227   | -0.291                  | -0.081                  | 0.028                  | -0.073                 | -0.417                   |
| I2237   | -1.739                  | -0.218                  | 0.051                  | -0.22                  | -2.126                   |
| W2239   | -5.659                  | -0.825                  | 0.698                  | -0.509                 | -6.295                   |
| V2240   | -1.087                  | -4.026                  | 0.687                  | -0.271                 | -4.697                   |
| P2241   | -0.189                  | -2.136                  | -0.12                  | -0.037                 | -2.482                   |
| A2248   | -0.29                   | 0.014                   | -0.142                 | -0.086                 | -0.504                   |
| M2345   | -1.75                   | -0.091                  | 0.081                  | -0.236                 | -1.996                   |
| I2356   | -2.996                  | -0.065                  | -0.328                 | -0.322                 | -3.711                   |
| D2357   | -2.35                   | 3.565                   | -3.11                  | -0.26                  | -2.155                   |
| F2358   | -0.337                  | 0.069                   | 0.134                  | -0.047                 | -0.181                   |

Compound **25** with PI3K $\alpha$

| Residue | $\Delta E_{\text{vdw}}$ | $\Delta E_{\text{ele}}$ | $\Delta G_{\text{GB}}$ | $\Delta G_{\text{SA}}$ | $\Delta G_{\text{bind}}$ |
|---------|-------------------------|-------------------------|------------------------|------------------------|--------------------------|
| I800    | -0.853                  | -0.148                  | 0.089                  | -0.168                 | -1.08                    |
| K802    | -0.408                  | 2.113                   | -1.772                 | -0.159                 | -0.226                   |
| D810    | -0.124                  | -2.269                  | 0.258                  | -0.149                 | -2.284                   |
| Y836    | -1.179                  | -1.784                  | 1.04                   | -0.309                 | -2.232                   |
| I848    | -1.285                  | -0.012                  | -0.078                 | -0.204                 | -1.579                   |
| V850    | -4.902                  | 0.201                   | -0.314                 | -0.195                 | -5.21                    |
| V851    | -1.545                  | -4.037                  | 0.956                  | -0.228                 | -4.854                   |
| R852    | -0.656                  | -0.401                  | -0.005                 | -0.107                 | -1.169                   |
| S854    | -0.485                  | -0.419                  | 0.037                  | -0.208                 | -1.075                   |
| M922    | -1.626                  | 0.086                   | -0.099                 | -0.186                 | -1.825                   |

|      |        |        |        |        |        |
|------|--------|--------|--------|--------|--------|
| I932 | -2.957 | -0.846 | -0.123 | -0.297 | -4.223 |
| D933 | -1.795 | -0.481 | -1.278 | -0.228 | -3.782 |

Compound **65** with PI3K $\alpha$

| Residue | $\Delta E_{\text{vdw}}$ | $\Delta E_{\text{ele}}$ | $\Delta G_{\text{GB}}$ | $\Delta G_{\text{SA}}$ | $\Delta G_{\text{bind}}$ |
|---------|-------------------------|-------------------------|------------------------|------------------------|--------------------------|
| R770    | -1.062                  | -4.156                  | 2.312                  | -0.286                 | -3.192                   |
| M772    | -0.989                  | -0.292                  | 0.306                  | -0.325                 | -1.3                     |
| S773    | -1.609                  | -1.112                  | 0.164                  | -0.254                 | -2.811                   |
| K802    | -0.879                  | -6.857                  | 3.696                  | -0.243                 | -4.283                   |
| D805    | -0.114                  | 2.661                   | -2.346                 | -0.003                 | 0.198                    |
| D810    | -0.657                  | -2.89                   | 2.034                  | -0.169                 | -1.682                   |
| Y836    | -1.785                  | 0.246                   | -0.233                 | -0.33                  | -2.102                   |
| C838    | -0.345                  | 0.109                   | -0.158                 | -0.073                 | -0.467                   |
| I848    | -1.839                  | 0.248                   | -0.317                 | -0.275                 | -2.183                   |
| V850    | -1.769                  | -0.694                  | -0.409                 | -0.217                 | -3.089                   |
| V851    | -2.034                  | -3.967                  | 0.578                  | -0.243                 | -5.666                   |
| R852    | -0.166                  | -2.804                  | -0.825                 | -0.033                 | -3.828                   |
| Q859    | -1.086                  | -0.693                  | 0.231                  | -0.246                 | -1.794                   |
| M922    | -1.761                  | 0.269                   | -0.288                 | -0.205                 | -1.985                   |
| I932    | -2.825                  | 0.057                   | -0.485                 | -0.293                 | -3.546                   |
| D933    | -2.171                  | 4.378                   | -3.625                 | -0.253                 | -1.671                   |
| F934    | -0.233                  | 0.161                   | -0.051                 | -0.019                 | -0.142                   |
